# Supplementary material for: Validation of the osteoporosis quality of life questionnaire QUALEFFO-41 for the Serbian population
Source: PubMed Central journal article supplement (PMC3464801; doi:10.1186/1477-7525-10-74), 2012-06-18
Supplement: 1477-7525-10-74-S1.pdf [file 1477-7525-10-74-S1.pdf]

Number of patients according to the number of vertebral fractures

| <u>Number of fractures</u> | <u>Number of patients (%)</u> |
|----------------------------|-------------------------------|
| 1                          | 27 (55.10)                    |
| 2                          | 8 (16.33)                     |
| 3                          | 5 (10.20)                     |
| 4                          | 4 (8.16)                      |
| 5                          | 3 (6.12)                      |
| 6                          | 1 (2.04)                      |
| 7                          | 0 (0.00)                      |
| 8                          | 0 (0.00)                      |
| 9                          | 1(2.04)                       |
